# Supplementary material
Source: Research Square preprint supplement (doi:10.21203/rs.3.rs-8896277/v1)
Supplement: Supplementary file 1 [file 7950d1334bda6a9b5289f140.docx]

Supplementary Material

[**Supplementary Appendix S1**. Rationale for QUADAS-2 Risk of Bias and Applicability Judgments 2](#_Toc221792345)

[**Supplementary Appendix F1** QUADAS-AI assessment Risk of Bias 3](#_Toc221792346)

# **Supplementary Appendix S1**. Rationale for QUADAS-2 Risk of Bias and Applicability Judgments

| Study | Patient selection | Index test (OpenEvidence) | Reference standard | Flow and timing |
| --- | --- | --- | --- | --- |
| Low et al. [13] | Unclear – selection of clinical questions not described as consecutive or predefined | Unclear – prompt standardization and rater blinding not reported | Low risk – multiple independent physicians used predefined evaluation criteria | Unclear – completeness of question evaluation not explicitly stated |
| Hurt et al. [15] | Unclear – retrospective case selection process not fully described | Unclear – limited information on prompt consistency and blinding | Low risk – independent clinician ratings using structured scales | Low risk – all cases evaluated without reported exclusions |
| Akpınar [16] | Unclear – question selection strategy not specified | Unclear – blinding and prompt standardization not reported | Low risk – expert surgeons used structured Likert-scale assessments | Unclear – evaluation completeness not clearly reported |
| Hajj et al. [19] | Unclear – rationale for question selection not fully described | Unclear – blinding of evaluators not reported | Low risk – independent specialist ratings with reported interrater agreement | Low risk – all questions assessed at a single time point |
| Borgonovo et al. [20] | Low risk – questions derived from published guidelines and expert validated | Unclear – evaluation protocol for OpenEvidence not fully detailed | Low risk – guideline-based binary scoring | Low risk – all questions systematically evaluated |
| Khabaz et al. [21] | Unclear – vignette construction and selection not fully described | Unclear – evaluation conditions and blinding not specified | Low risk – multiple clinicians independently assessed responses | Unclear – evaluation completeness not explicitly stated |
| Hooshiar [22] | Unclear – prompt selection not described as predefined or consecutive | Unclear – blinding and repeatability not reported | Low risk – explicit assessment of accuracy and hallucination | Unclear – limited reporting on evaluation flow |
| Hurt et al. [23] | Unclear – case inclusion criteria not fully specified | Unclear – prompt consistency and rater blinding not reported | Low risk – expert reviewers assessed all outputs | Low risk – all cases evaluated without exclusion |
| Masanneck et al. [24] | Low risk – guideline-derived questions used systematically | Unclear – OpenEvidence evaluated as comparator with limited protocol detail | Low risk – structured accuracy assessment with high interrater agreement | Low risk – complete evaluation reported |
| Toppeta et al. [25] | Unclear – vignette selection procedures not fully described | Unclear – prompt variability across time points | Low risk – guideline adherence used as benchmark | Unclear – evaluations conducted at multiple time points |
| Wasserman et al. [26] | Unclear – vignette selection method not fully specified | Unclear – evaluator blinding not reported | Low risk – senior clinician rankings used as reference | Low risk – all vignettes evaluated |

# **Supplementary Appendix F1** QUADAS-AI assessment Risk of Bias
